# Supplementary figures and images for: Predictors of Response and Survival in Immune Checkpoint Inhibitor-Treated Unresectable Hepatocellular Carcinoma
Source: MDPI journal article supplement (doi:10.3390/cancers12010182), 2020-01-11

Supplementary figure 1

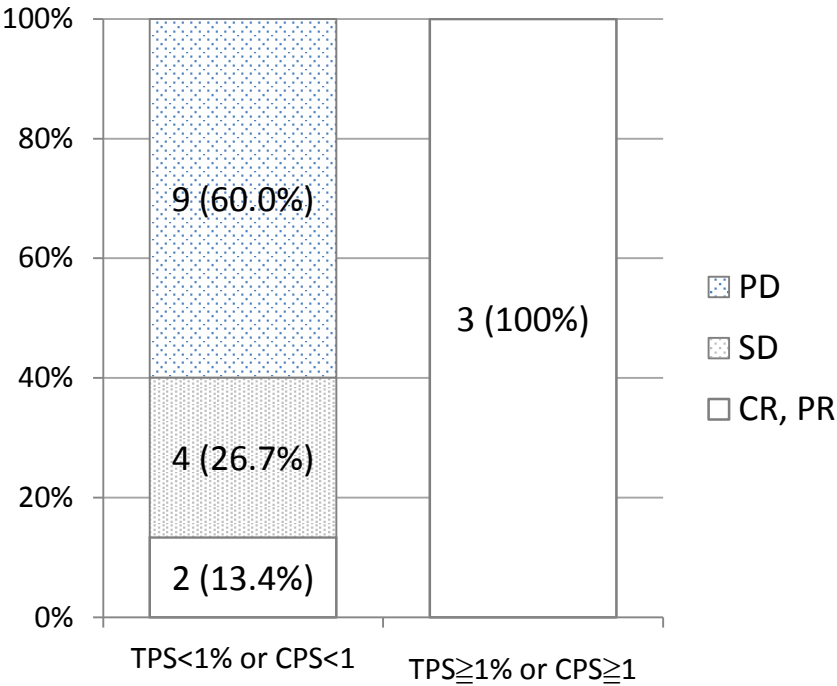

| TPS or CPS       | TPS<1% or<br>CPS < 1 | TPS ≥ 1% or<br>CPS ≥ 1 |
|------------------|----------------------|------------------------|
|                  |                      |                        |
| CR, PR, SD       | 6                    | 3                      |
| PD               | 9                    | 0                      |
| <i>p</i> = 0.206 |                      |                        |

Evaluable PD-L1 level, n = 18

Supplement: s1 [file s1]
